# Supplementary material for: RNA-seq analysis of Pichia anomala reveals important mechanisms required for survival at low pH
Source: PubMed Central journal article supplement (PMC4574170; doi:10.1186/s12934-015-0331-4), 2015-09-16

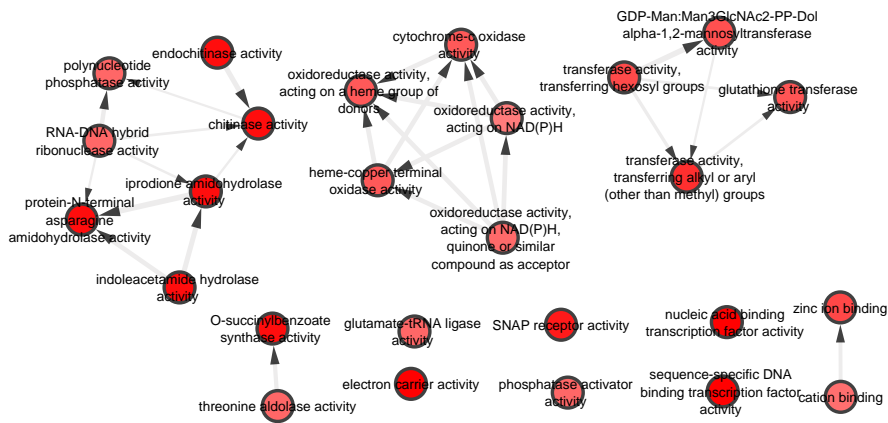

Supplement: 12934_2015_331_MOESM6_ESM.pdf [file 12934_2015_331_MOESM6_ESM.pdf]
